# Supplementary material for: Discerning Developmental Dyscalculia and Neurodevelopmental Models of Numerical Cognition in a Disadvantaged Educational Context
Source: MDPI journal article supplement (doi:10.3390/brainsci12050653), 2022-05-16
Supplement: s1 [file s1]

## Supplementary Materials

**Table S1 – Performance on verbal QI, RCPM, and SAT total tests in Brazilian children per gender**

|                                                    | <b>Girls</b>   | <b>Boys</b>    | <b>t</b> | <b>p</b> |
|----------------------------------------------------|----------------|----------------|----------|----------|
| Verbal QI – WISC III ( <i>n</i> = 134)*            | 104.16 (11.58) | 106.77 (12.72) | -1.24    | 0.22     |
| RCPM ( <i>n</i> = 169)**                           | 67.17 (19.28)  | 67.00 (22.10)  | 0.05     | 0.96     |
| School Achievement Test – SAT ( <i>n</i> = 118)*** |                |                |          |          |
| Written subtest                                    | 19.76 (7.23)   | 20.89 (6.88)   | -0.87    | 0.39     |
| Arithmetic subtest                                 | 12.40 (5.14)   | 11.67 (4.36)   | 0.84     | 0.40     |
| Reading subtest                                    | 57.53 (10.78)  | 58.06 (11.15)  | -0.26    | 0.79     |
| Total                                              | 89.68 (20.67)  | 90.41 (19.72)  | - 0.19   | 0.85     |

Legend: WISC III: Wechsler Intelligence Scale for Children; RCPM: Raven's Coloured Progressive Matrices; SAT: School Achievement Test. \*67 boys and 67 girls; \*\*76 girls and 93 boys; \*\*\*55 girls and 63 boys

**Table S2.** Reliability results for a subset of participants for abstract reasoning and numerical cognition measures.

|                                           | Pre-test      | Post-test       | Wilcoxon            |        | Spearman |         |
|-------------------------------------------|---------------|-----------------|---------------------|--------|----------|---------|
|                                           | (n=14)        | (n=14)          | Z                   | P      | R        | p       |
| CPM                                       | 61.78 (18.56) | 70.71 (20.46)   | -2.35 <sup>b</sup>  | 0.02   | 0.76     | 0.002   |
| Counting dots <sup>a</sup>                | 3.36 (0.93)   | 3.18 (1.88)     | -0.58 <sup>b</sup>  | 0.56   | 0.11     | 0.71    |
| Counting backwards <sup>b</sup>           | 2.03 (1.36)   | 2.80 (1.35)     | -1.98 <sup>b</sup>  | 0.04*  | 0.62     | 0.02*   |
| Dictation of numbers <sup>c</sup>         | 6.33 (3.90)   | 12.18 (3.91)    | -1.24               | 0.21   | 0.91     | <0.001* |
| Mental calculation <sup>c</sup>           | 12.19 (9.00)  | 22.62 (11.37)   | -1.74               | 0.08   | 0.85     | <0.001* |
| Reading numbers <sup>d</sup>              | 7.92 (4.63)   | 13.20 (3.68)    | -0.138 <sup>c</sup> | 0.89   | 0.86     | <0.001* |
| Memory of Digits                          | 21.34 (5.64)  | 23.24 (7.02)    | -2.39 <sup>b</sup>  | 0.02*  | 0.70     | 0.005*  |
| Positioning on a number line <sup>b</sup> | 11.13 (5.88)  | 15.49 (4.74)    | -0.55 <sup>b</sup>  | 0.58   | 0.80     | 0.001*  |
| Oral comparison <sup>d</sup>              | 10.92 (3.42)  | 12.65 (2.81)    | -1.41 <sup>c</sup>  | 0.16   | 0.28     | 0.33    |
| Perceptual estimation <sup>e</sup>        | 5.50 (2.36)   | 6.08 (2.49)     | -0.14 <sup>c</sup>  | 0.89   | 0.18     | 0.53    |
| Contextual estimation <sup>f</sup>        | 8.39 (3.99)   | 10.30 (4.50)    | -1.28 <sup>b</sup>  | 0.20   | 0.56     | 0.04*   |
| Problem solving <sup>d</sup>              | 2.81 (3.25)   | 5.42 (3.58)     | -0.57 <sup>b</sup>  | 0.57   | 0.49     | 0.07    |
| Written comparison <sup>g</sup>           | 16.72 (3.03)  | 18.46 (2.68)    | -1.34               | 0.18   | 0.87     | <0.001* |
| Zareki-R Total <sup>d</sup>               | 99.07 (43.15) | 134.05 (332.25) | -3.24               | 0.001* | 0.99     | <0.001* |
| Score A                                   | 56.89 (20.38) | 84.53 (22.22)   | -1.61 <sup>b</sup>  | 0.11   | 0.94     | <0.001* |

Legend: CPM=Raven's Coloured Progressive Matrices. \* < 0.05.

**Table S3.** Correlation between Zareki-R and Arithmetic of WISC-III or Arithmetic of SAT.

|                              | Arithmetic of WISC-III<br>(N=122) | Arithmetic of SAT<br>(N=118) |
|------------------------------|-----------------------------------|------------------------------|
| Counting dots                | 0.18                              | 0.26                         |
| Counting backwards           | 0.49*                             | 0.45*                        |
| Dictation of numbers         | 0.49*                             | 0.54*                        |
| Mental calculation           | 0.62†                             | 0.70†                        |
| Reading numbers              | 0.49*                             | 0.47*                        |
| Positioning on a number line | 0.39                              | 0.28                         |
| Oral comparison              | 0.41                              | 0.44*                        |
| Perceptual estimation        | 0.22                              | 0.25                         |
| Contextual estimation        | 0.36                              | 0.42*                        |
| Written comparison           | 0.38                              | 0.30                         |
| Problem solving              | 0.58*                             | 0.71†                        |
| Total score                  | 0.63†*                            | 0.72†                        |
| Score A                      | 0.62†*                            | 0.74†                        |

(\*) Moderate correlations ( $0.40 < r < 0.59$ ); (†) Strong correlation ( $0.60 < r < 0.79$ );  $p < 0.05$ . *Legend.* Zareki-R: Neuropsychological test battery for Number Processing and Calculation in Children, Revised; WISC-III: Wechsler Intelligence Scale for Children; SAT: School Achievement test.
